# Supplementary material for: MicroRNA-362-3p Inhibits Migration and Invasion via Targeting BCAP31 in Cervical Cancer
Source: PubMed Central journal article supplement (PMC7296163; doi:10.3389/fmolb.2020.00107), 2020-06-09
Supplement: Data_Sheet_1.pdf [file Data_Sheet_1.pdf]

## Supplementary Figures and Table

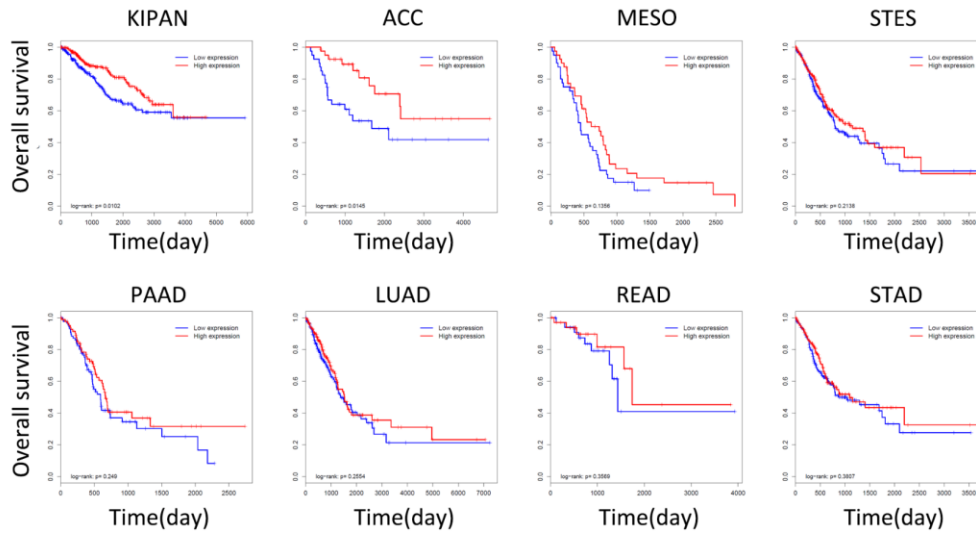

**Supplementary Figure S1. Survival curves of different cancers with low/high miR-362 expression from TCGA database.**

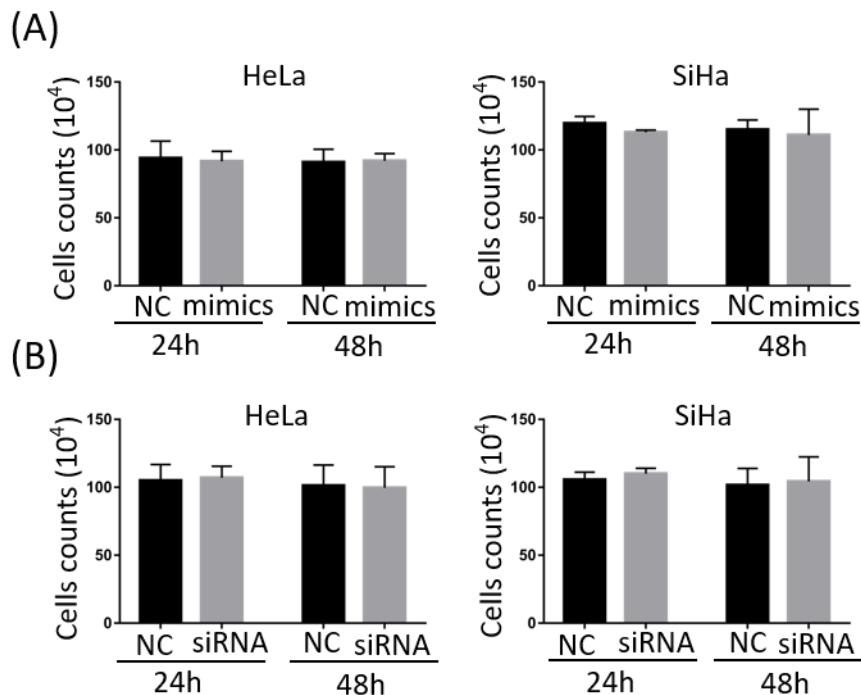

**Supplementary Figure S2. There was no significant difference in the number of cells in each group after mitomycin C treatment.**

(A) Cells counts at 24h and 48h after mitomycin C treatment in NC and miR-362-3p mimics groups. (B) Cells counts at 24h and 48h after mitomycin C treatment in NC and BCAP31 siRNA groups.

**Supplementary Table S1. The top 30 enriched gene sets in the BCAP31 expression phenotype of cervical cancer data from TCGA**

| <b>Gene set name</b>          | <b>NES</b> | <b>NOM p-val</b> | <b>FDR q-val</b> |
|-------------------------------|------------|------------------|------------------|
| PROTEIN_FOLDING               | -2.28      | <0.001           | <0.001           |
| RESPONSE_TO_OXIDATIVE_STRESS  | -2.26      | <0.001           | <0.001           |
| MITOCHONDRIAL_PART            | -2.23      | <0.001           | <0.001           |
| MITOCHONDRIAL_ENVELOPE        | -2.19      | <0.001           | <0.001           |
| MITOCHONDRION                 | -2.19      | <0.001           | <0.001           |
| MITOCHONDRIAL_MEMBRANE_PART   | -2.14      | <0.001           | 0.002            |
| ENVELOPE                      | -2.13      | <0.001           | 0.004            |
| ORGANELLE_ENVELOPE            | -2.13      | <0.001           | 0.004            |
| MITOCHONDRIAL_MEMBRANE        | -2.13      | <0.001           | 0.003            |
| GTP_BINDING                   | -2.08      | <0.001           | 0.005            |
| PROTEASOME_COMPLEX            | -2.06      | <0.001           | 0.006            |
| GUANYL_NUCLEOTIDE_BINDING     | -2.06      | <0.001           | 0.007            |
| ORGANELLE_MEMBRANE            | -2.06      | <0.001           | 0.006            |
| HYDROGEN_ION_TRANSMEMBRANE_   | -2.05      | <0.001           | 0.007            |
| TRANSPORTER_ACTIVITY          |            |                  |                  |
| UNFOLDED_PROTEIN_BINDING      | -2.05      | <0.001           | 0.006            |
| ELECTRON_CARRIER_ACTIVITY     | -2.04      | <0.001           | 0.01             |
| MITOCHONDRIAL_INNER_MEMBRANE  | -2.03      | <0.001           | 0.01             |
| RIBOSOME                      | -2.03      | <0.001           | 0.01             |
| PHOSPHOTRANSFERASE_ACTIVITY_P | -2.02      | <0.001           | 0.01             |
| HOSPHATE_GROUP_AS_ACCEPTOR    |            |                  |                  |
| RIBONUCLEOPROTEIN_COMPLEX     | -1.98      | 0.02             | 0.023            |
| MACROMOLECULE_CATABOLIC_PROC  | -1.97      | <0.001           | 0.023            |
| ESS                           |            |                  |                  |
| MITOCHONDRION_ORGANIZATION_A  | -1.95      | <0.001           | 0.025            |
| ND_BIOGENESIS                 |            |                  |                  |

|                                                                        |       |        |       |
|------------------------------------------------------------------------|-------|--------|-------|
| MITOCHONDRIAL_RESPIRATORY_CHA<br>IN                                    | -1.95 | <0.001 | 0.024 |
| INDUCTION_OF_APOPTOSIS_BY_INTR<br>ACELLULAR_SIGNALS                    | -1.94 | <0.001 | 0.025 |
| ORGANELLE_INNER_MEMBRANE                                               | -1.94 | 0.02   | 0.025 |
| INDUCTION_OF_APOPTOSIS_BY_EXTR<br>ACELLULAR_SIGNALS                    | -1.93 | <0.001 | 0.026 |
| NEGATIVE_REGULATION_OF_TRANSC<br>RIPTION_FACTOR_ACTIVITY               | -1.92 | <0.001 | 0.028 |
| MONOVALENT_INORGANIC_CATION_<br>TRANSMEMBRANE_TRANSPORTER_A<br>CTIVITY | -1.92 | <0.001 | 0.028 |
| NUCLEOBASENUCLEOSIDENUCLEOTI<br>DE_KINASE_ACTIVITY                     | -1.92 | <0.001 | 0.026 |
| RIBONUCLEASE_ACTIVITY                                                  | -1.92 | 0.02   | 0.027 |

---

NES: normalized enrichment score; NOM: nominal; FDR: false discovery rate. Gene sets with NOM P-values <0.05 and FDR q-values <0.25 were considered significantly enriched.
